# Supplementary material
Source: PubMed Central journal article supplement (PMC4729265)

# Supplemental Figure 1

A

## Representative MRM chromatography & MS/MS Spectra from Smoke Exposed Mouse Lung

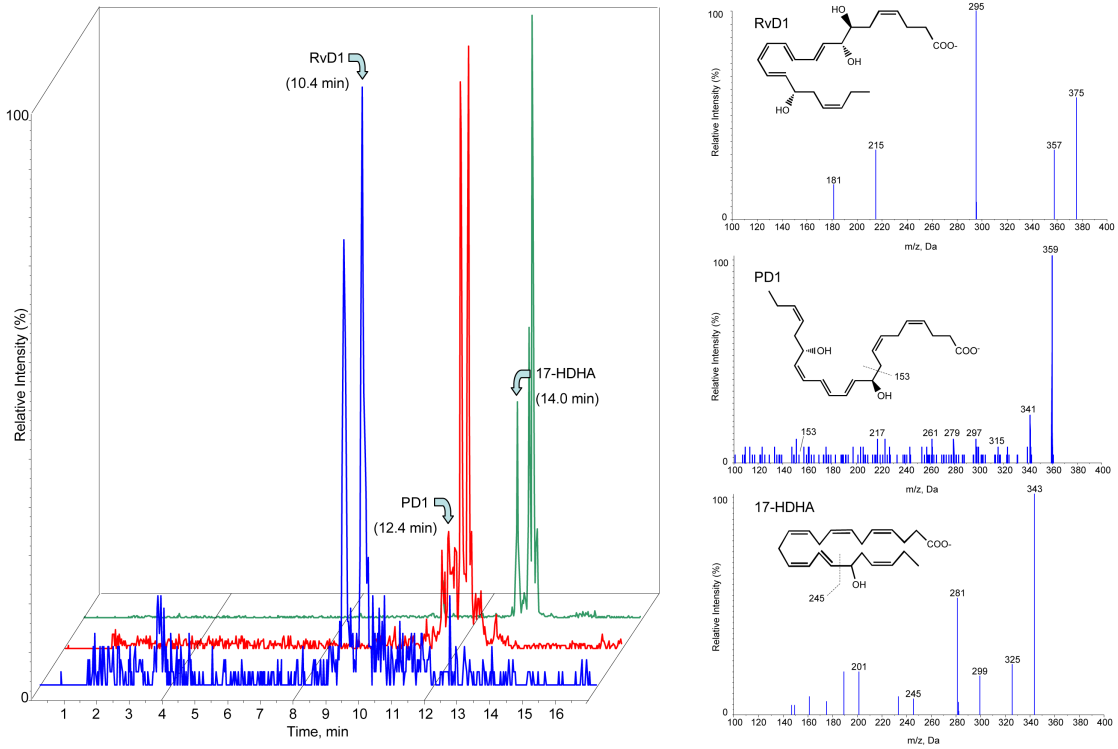

## B RvD1 in mouse lung homogenate

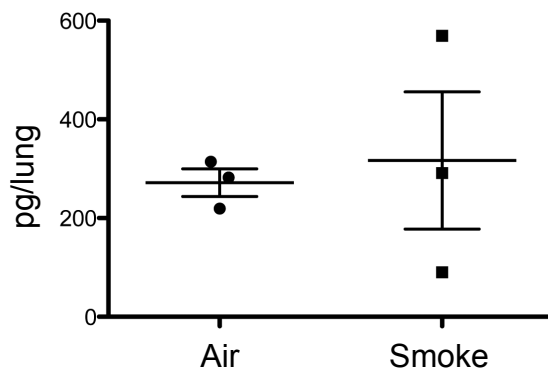

Supplement: mmc1.pdf [file mmc1.pdf]
