# Supplementary material
Source: PubMed Central journal article supplement (PMC4729265)

# Supplemental Figure 4

Vehicle/Air

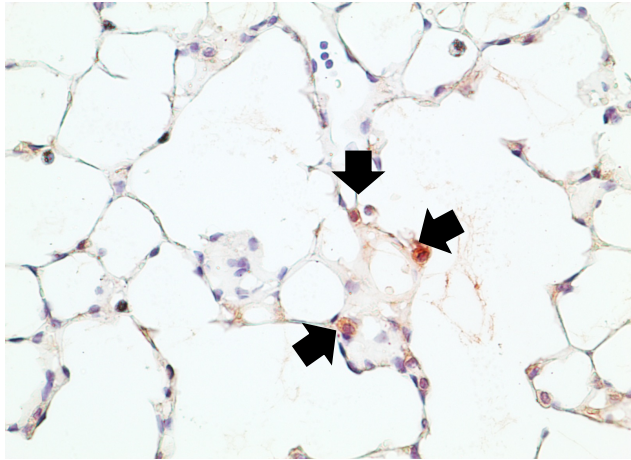

AT-RvD1/Air

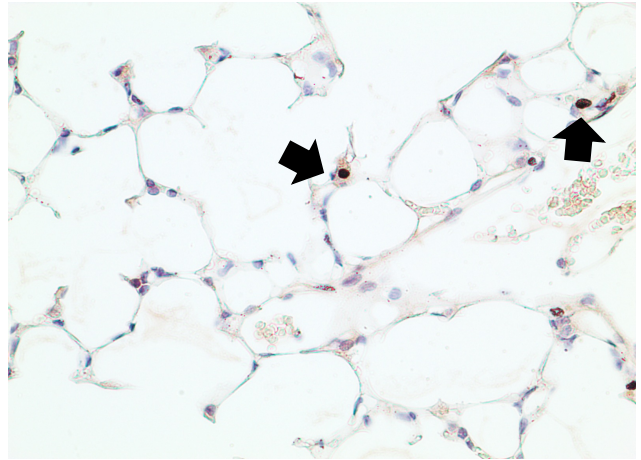

Vehicle/Smoke

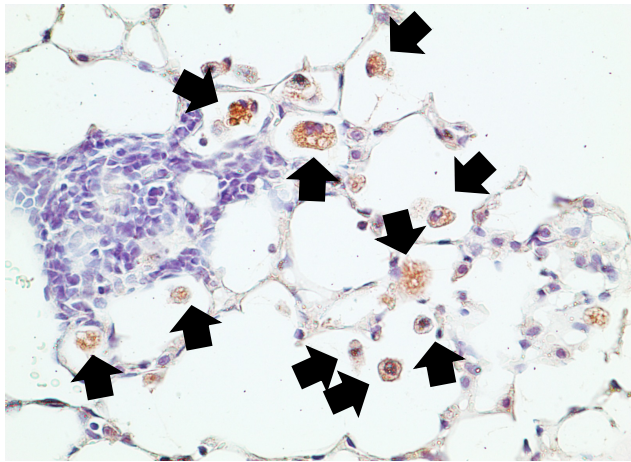

AT-RvD1/Smoke

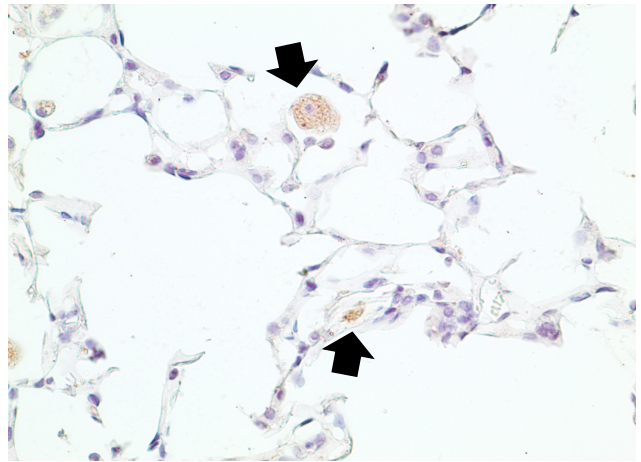

Vehicle/Smoke

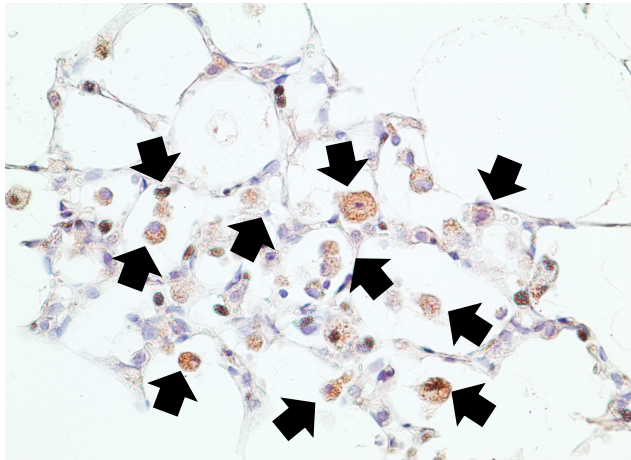

AT-RvD1/Smoke

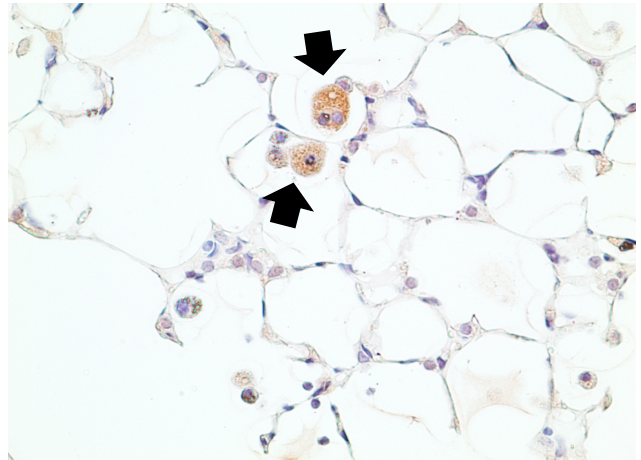

Supplement: mmc4.pdf [file mmc4.pdf]
